# Supplementary material
Source: Research Square preprint supplement (doi:10.21203/rs.3.rs-9450859/v1)
Supplement: Supplementary file 1 [file 84a09859b9beef1d22ee441a.docx]

18F-FDG-PET-guided, pathological complete response-adapted chemotherapy de-escalation in HER2-positive early breast cancer: 5-year outcomes and exploratory ctDNA analyses from the randomized phase 2 PHERGain trial

Pérez-García J. et al.,

Supplementary material

[Supplementary methods 1](#_Toc223340232)

[*Inclusion criteria:* 1](#_Toc223340233)

[*Exclusion criteria:* 2](#_Toc223340234)

[*Randomization and masking* 3](#_Toc223340235)

[Supplementary Fig. 1. PHERGain study design. 4](#_Toc223340236)

[Supplementary Fig. 2. Consort diagram of plasma sample collection for ctDNA analyses at baseline, the day after cycle 2 (C3D1) and pre-surgery. 5](#_Toc223340237)

[Supplementary Fig. 3. Association between ctDNA clearance and PET response. 5](#_Toc223340238)

[Supplementary Fig. 4. Association between ctDNA status and clearance with 5-year DDFS. 5](#_Toc223340239)

[Supplementary Table 1. 5-year iDFS events by ctDNA status at baseline. 6](#_Toc223340240)

[Supplementary Table 2. 5-year iDFS events by ctDNA status at C3D1 7](#_Toc223340241)

[Supplementary Table 3. 5-year iDFS events by ctDNA clearance at C3D1 7](#_Toc223340242)

# **Supplementary methods**

## ***Inclusion criteria:***

Patients were included in the study only if they meet ALL of the following criteria:

1. Written informed consent prior to beginning specific protocol procedures.
2. Female or male patients ≥ 18 years of age.
3. Eastern Cooperative Oncology Group (ECOG) performance status of 0-1.
4. Histologically proven invasive breast cancer.
5. Operable breast cancer (cT1-3 and/or cN0-2 tumors).
6. Tumor size larger than or equal to 1.5 centimeter (cm) in diameter by magnetic resonance imaging (MRI) or ultrasound with a significant 18F-FDG uptake defined as maximum standardized uptake value (SUVmax) ≥1.5 x SUVmean liver + 2 SD.

Multicentric/multifocal tumors will be allowed only if:

1. Histological confirmation of at least two lesions.

2. All tumors must be HER2-positive.

3. Largest lesion must be larger than or equal to 1.5 cm in diameter by MRI or ultrasound.

1. Centrally confirmed HER2-positive disease according to the 2018 American Society of Clinical Oncology/College of American Pathologists (ASCO/CAP) criteria.
2. Patient must have known estrogen receptor (ER) and progesterone receptor (PR) status locally determined prior to study entry.

Patient has adequate bone marrow, liver, and renal function:

1. Hematological: White blood cell (WBC) count > 3.0 x 109/L, absolute neutrophil count (ANC) ≥ 1.5 x 109/L, platelet count ≥ 100.0 x109/L, and hemoglobin ≥ 10.0 g/dL (≥ 6.2 mmol/L).
2. Hepatic: total bilirubin ≤ institutional upper limit of normal (ULN) (except for Gilbert’s syndrome); alkaline phosphatase (ALP) ≤ 2.5 times ULN; aspartate transaminase (AST) and alanine transaminase (ALT) ≤ 1.5 times ULN.
3. Renal: serum creatinine ≤ 1.5 x ULN or creatinine clearance ≥ 50 mL/min/1.73 m2 for patients with creatinine levels above institutional normal.
4. Patient must be accessible for treatment and follow-up.

## ***Exclusion criteria:***

Any patient meeting ANY of the following criteria was excluded from the study:

1. Previous treatment with chemotherapy, anti-HER2 therapy, radiation therapy, or endocrine therapy for invasive breast cancer.
2. cT4 and/or cN3 tumors.
3. Bilateral breast cancer.
4. Evidence of metastatic disease by routine clinical assessment [chest x-ray, liver ultrasound, and bone scan; or computed tomography (CT) scan of thorax and and abdomen and bone scan], except patients with subclinical M1 at baseline only according to 18F-fluorodeoxyglucose (18F-FDG) positron emission tomography/computed tomography (PET/CT) that will be allowed to be included into Cohort C.
5. Known hypersensitivity reaction to any investigational or therapeutic compound or their incorporated substances.
6. History of other malignancy within the last five years prior to first dose of study drug administration, except for curatively treated basal and squamous cell carcinoma of the skin and/or in situ cervical carcinoma.
7. Left ventricular ejection fraction (LVEF) below 55% as determined by multiple-gated acquisition (MUGA) scan or echocardiography (ECHO).
8. Uncontrolled hypertension (systolic > 150 mm Hg and/or diastolic > 100 mm Hg) despite adequate antihypertensive treatment.
9. Clinically significant cardiovascular disease [stroke, unstable angina pectoris, or documented myocardial infarction within six months prior to study entry; history of documented congestive heart failure (CHF) (New York Heart Association II-III-IV); symptomatic pericarditis; documented cardiomyopathy; ventricular arrytmhias with the exception of benign premature ventricular contractions; conduction abnormality requiring a pacemaker; other arrhythmias not controlled with medication].
10. Active uncontrolled infection at the time of enrollment.
11. Current known infection with HIV, hepatitis B virus, or hepatitis C virus.
12. Patients with pulmonary disease requiring continuous oxygen therapy.
13. Previous history of bleeding diathesis.
14. Patient is currently receiving anti-coagulant therapy, chronic treatment with corticosteroids, or another immunosuppressive agent (standard premedication for chemotherapy and local applications are allowed).
15. Major surgical procedure or significant traumatic injury within 14 days prior to randomization or anticipation of need for major surgery within the course of the study treatment.
16. Patient has other concurrent severe and/or uncontrolled medical condition that would, in the investigator´s judgment, contraindicate her participation in the clinical study.
17. Concurrent participation in other clinical trial, except other translational studies.
18. History of receiving any investigational treatment within 28 days prior to randomization.
19. Pregnant or breast-feeding women or patients not willing to apply highly effective contraception as defined in the protocol.

## ***Randomization and masking***

Patients who underwent baseline 18F-FDG-PET were randomly assigned in a 1:4 ratio to groups A or B. A central randomization procedure was set up with the OpenClinica web-based software. Randomization was stratified by hormone receptor status (positive or negative). Patients with subclinical metastases detected at baseline 18F-FDG-PET, but not previously detected by routine clinical assessment, were included in an exploratory group C (not reported in this article). In this open-label study, patients, Investigators, and the study team were aware of the group assignment. However, Investigators participating in the centralized review of 18F-FDG-PET results were masked to the group assignment.

# **Supplementary Fig. 1.** PHERGain study design.


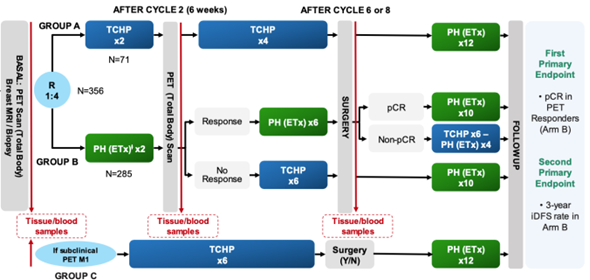


**Abbreviations:**

C: Carboplatin; D: Docetaxel; EBC: Early breast cancer; ETx: Endocrine therapy (letrozole post-menopausal/tamoxifen pre-menopausal), Adjuvant ETx up to 3 years from surgery; PET: 18F-fluorodeoxyglucose positron emission tomography/computed tomography;  H: Trastuzumab SC; HER2: Human Epidermal Growth Factor Receptor 2; iDFS: Invasive disease-free survival; MRI: Magnetic resonance Imaging; P: Pertuzumab IV; R: Randomization; TCHP: Trastuzumab, pertuzumab, docetaxel, and carboplatin.

ⱡ  All hormonal receptor-positive patients received ETx concomitantly with PH (except on chemotherapy).

​​PET RESPONDERS: RECIST responders after cycle 2 with SUVmax reduction ≥40%.​

pCR, Pathological complete response (ypT0/isN0)

# **Supplementary Fig. 2.** Consort diagram of plasma sample collection for ctDNA analyses at baseline, the day after cycle 2 (C3D1) and pre-surgery.


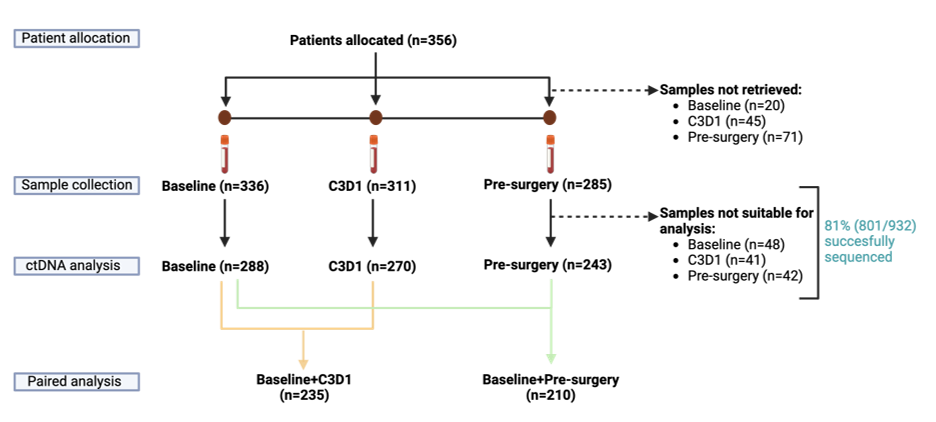


# **Supplementary Fig. 3.** Association between ctDNA clearance and PET response.


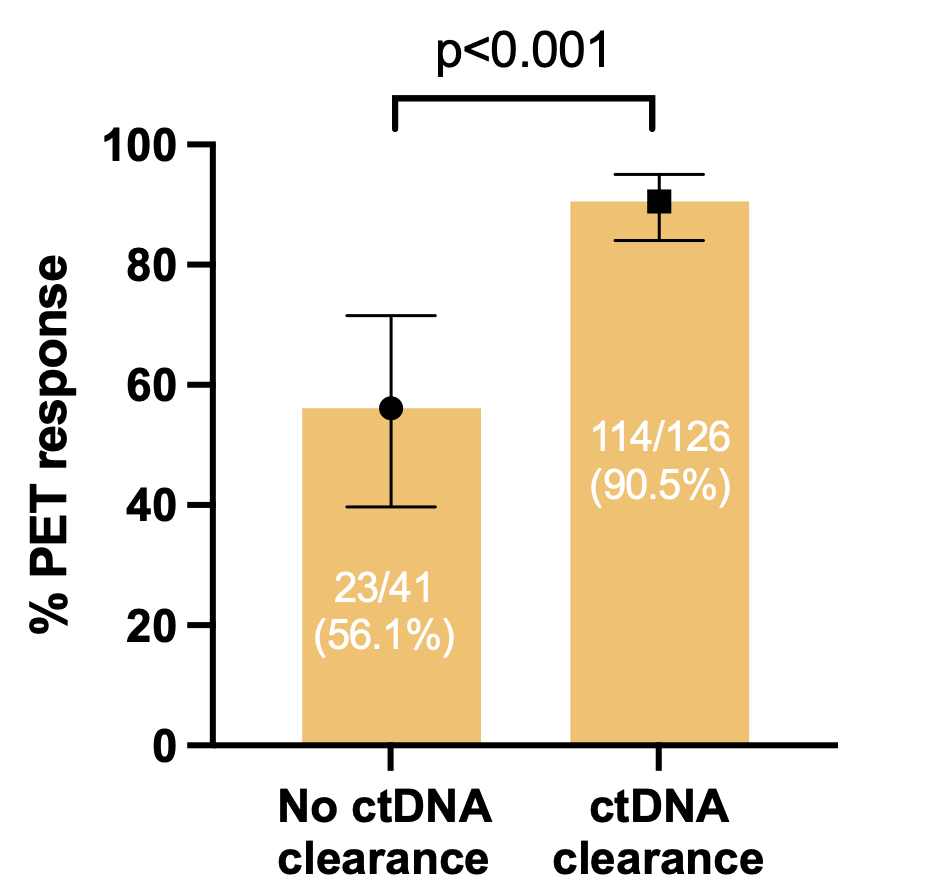


**Supplementary Fig. 4.** Association between ctDNA status at C3D1 and pre-surgery and clearance with 5-year DDFS. *Cox multivariate model adjusting for disease stage and nodal status. ctDNA clearance (ref) vs no ctDNA clearance.


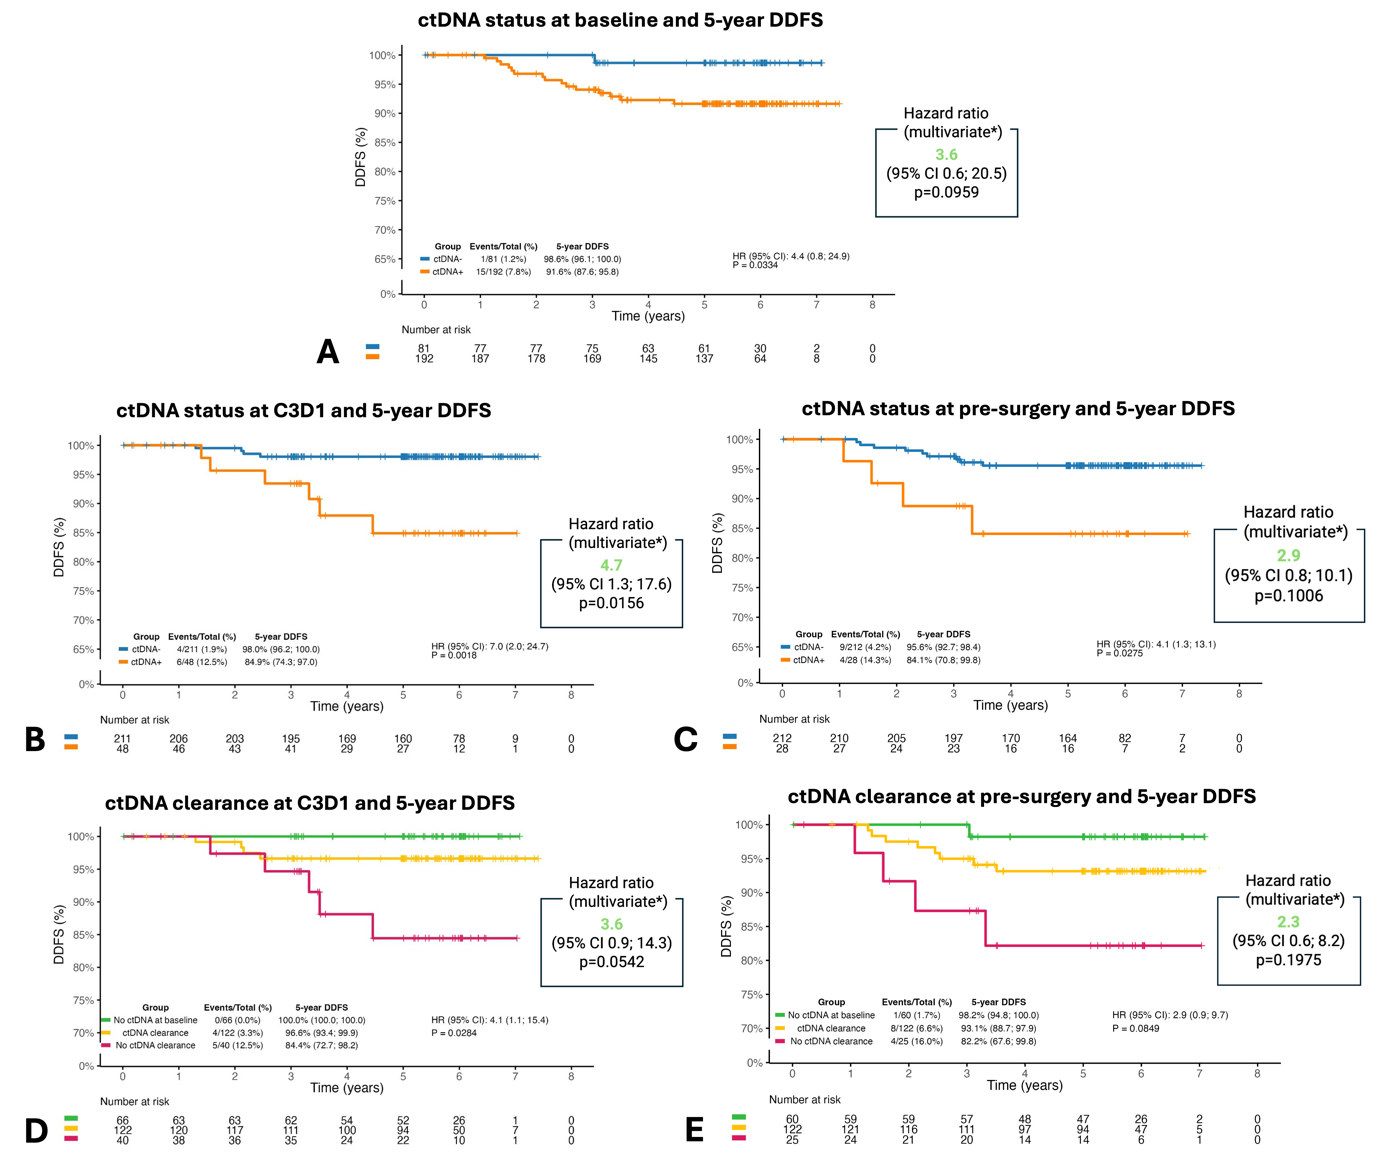


# **Supplementary Table 1.** 5-year iDFS events by ctDNA status at baseline.

|  | n |
| --- | --- |
| ctDNA- |  |
| Contralateral invasive breast cancer | 1 |
| Distant recurrence | 1 |
| ctDNA+ |  |
| Distant recurrence | 13 |
| Second primary non-breast invasive cancer | 4 |
| Regional invasive breast cancer recurrence | 3 |
| Death | 2 |
| Ipsilateral invasive breast tumor recurrence | 2 |

# **Supplementary Table 2.** 5-year iDFS events by ctDNA status at C3D1

|  | n |
| --- | --- |
| ctDNA- |  |
| Ipsilateral invasive breast tumor recurrence | 3 |
| Second primary non-breast invasive cancer | 3 |
| Death | 2 |
| Distant recurrence | 2 |
| Contralateral invasive breast cancer | 1 |
| ctDNA+ |  |
| Distant recurrence | 6 |
| Regional invasive breast cancer recurrence | 2 |
| Second primary non-breast invasive cancer | 1 |

# **Supplementary Table 3.** 5-year iDFS events by ctDNA clearance at C3D1

|  | n |
| --- | --- |
| No ctDNA at baseline |  |
| Contralateral invasive breast cancer | 1 |
| ctDNA clearance |  |
| Second primary non-breast invasive cancer | 3 |
| Death | 2 |
| Distant recurrence | 2 |
| Ipsilateral invasive breast tumor recurrence | 2 |
| No ctDNA clearance |  |
| Distant recurrence | 5 |
| Regional invasive breast cancer recurrence | 2 |
| Second primary non-breast invasive cancer | 1 |
